# Supplementary material
Source: Royal Society of Chemistry journal article supplement (doi:10.1039/d6nj00901h)
Supplement: d6nj00901h1.pdf [file d6nj00901h1.pdf]

# A Hydrogen Peroxide-Responsive Supramolecular Pseudopolyrotaxane Driven by Pillararene-Based Molecular Recognition and Metal-Ligand Interaction

Liguo Ye, Yaozhong Zhang, Yujuan Zhou\* and Jie Yang\*

*College of Science, Nanjing Forestry University, Nanjing, 210037 P. R. China;*

*E-mail: yujuanzhou@njfu.edu.cn; jieyang@njfu.edu.cn.*

## Electronic Supplementary Information (12 pages)

|                                                                                             |     |
|---------------------------------------------------------------------------------------------|-----|
| 1. <i>Materials and methods</i>                                                             | S2  |
| 2. <i>Synthesis of <b>SeP5</b>, <b>SeOP5</b> and <b>G</b></i>                               | S3  |
| 3. <i>Host–guest complexation between <b>SeP5</b> and <b>G</b></i>                          | S5  |
| 4. <i>H<sub>2</sub>O<sub>2</sub>-responsiveness of <b>SeP5</b> and <b>G</b> complex</i>     | S7  |
| 5. <i>H<sub>2</sub>O<sub>2</sub>-responsiveness of poly-pseudorotaxane <b>SeP5-G-Ag</b></i> | S7  |
| 6. <i>DOSY NMR spectra of <b>SeP5-G-Ag</b> at different concentrations</i>                  | S8  |
| 7. <i>The host–guest control experiment</i>                                                 | S11 |
| 8. <i>H<sub>2</sub>O<sub>2</sub>-responsiveness of <b>G-Ag</b></i>                          | S11 |
| 9. <i>References</i>                                                                        | S12 |

### *1. Materials and methods*

All reagents were commercially available and used as supplied without further purification. Solvents were either employed as purchased or dried according to procedures described in the literature. **SeP5**<sup>S1</sup> and **G**<sup>S2</sup> were prepared according to published procedures. <sup>1</sup>H NMR spectra were recorded with a Bruker Avance DMX 400 spectrophotometer. The 2D DOSY NMR spectrum was collected on a Bruker Avance DMX 500 using the deuterated solvent as the lock and the residual solvent or TMS as the internal reference. Isothermal titration calorimetry (ITC) experiment was performed on a VP-ITC micro-calorimeter (Microcal, USA). Viscosity measurements were carried out with a Cannon-Ubbelohde semi-micro dilution viscomeer at 298 K.

## 2. Synthesis of *SeP5*, *SeOP5* and *G*

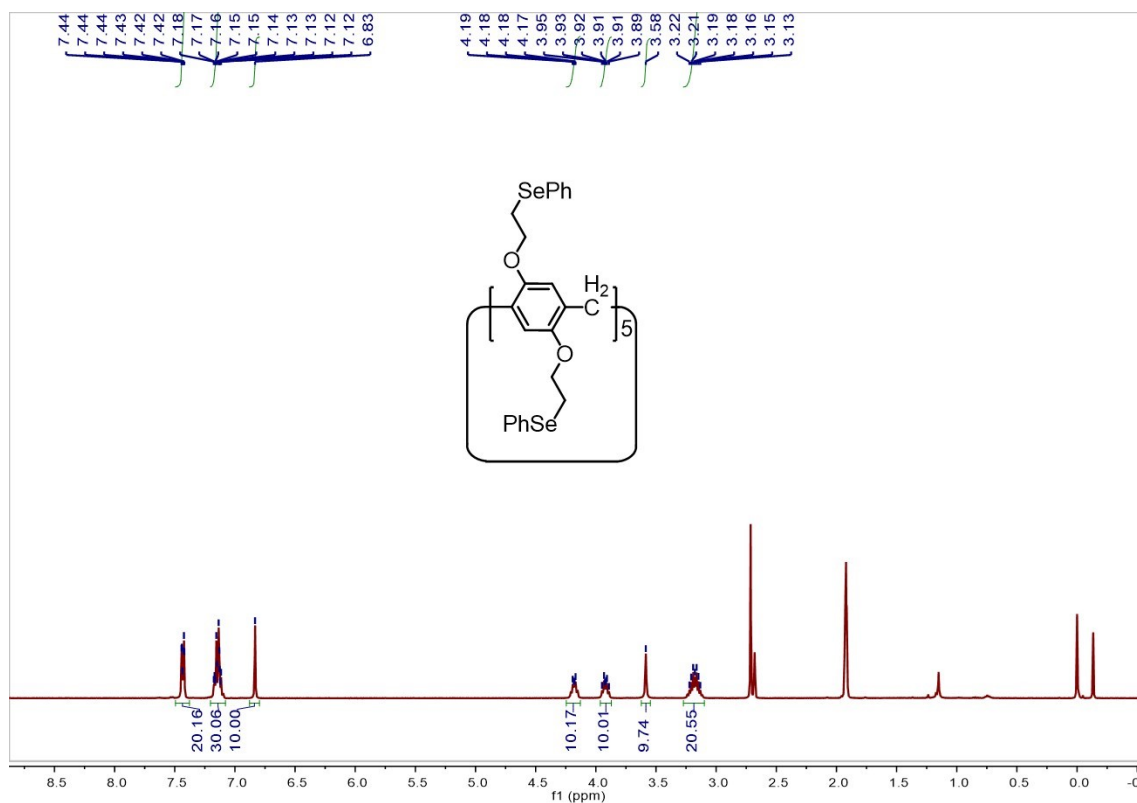

**Fig. S1** <sup>1</sup>H NMR spectrum (400 MHz, acetone-*d*<sub>6</sub>, 293K) of *SeP5*.<sup>S1</sup>

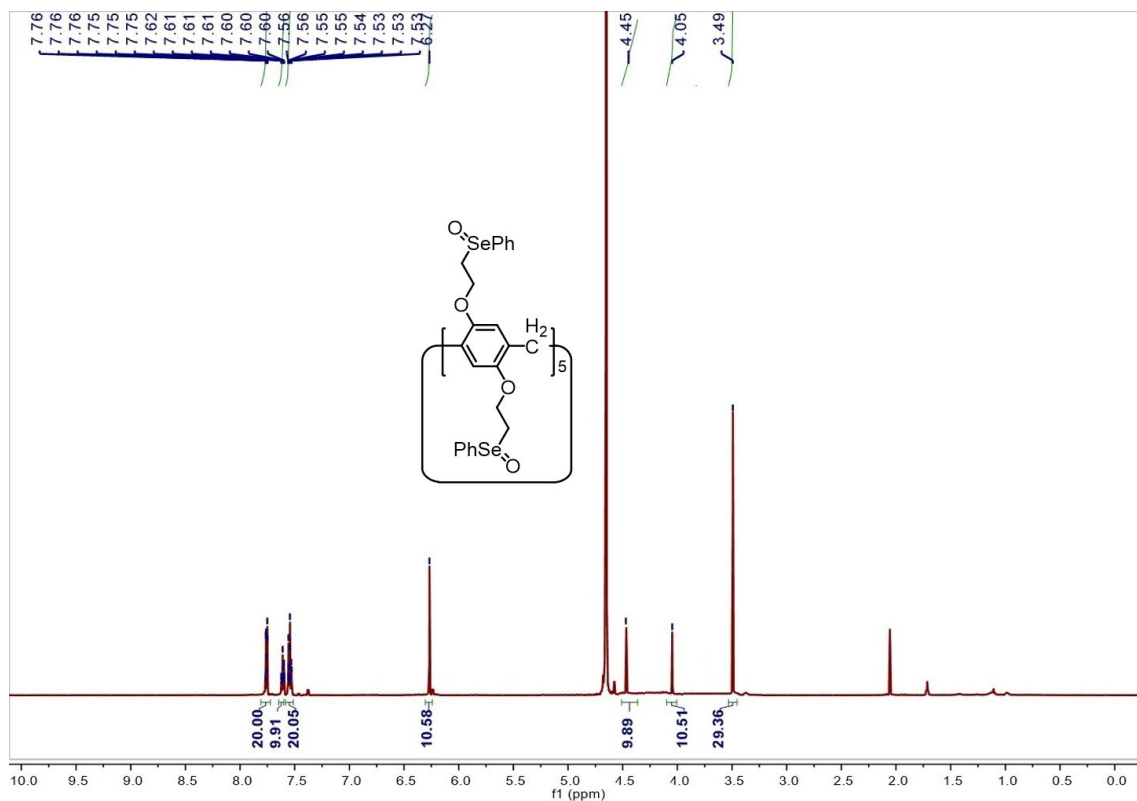

**Fig. S2** <sup>1</sup>H NMR spectrum (400 MHz, D<sub>2</sub>O, 293K) of *SeOP5*.<sup>S1</sup>

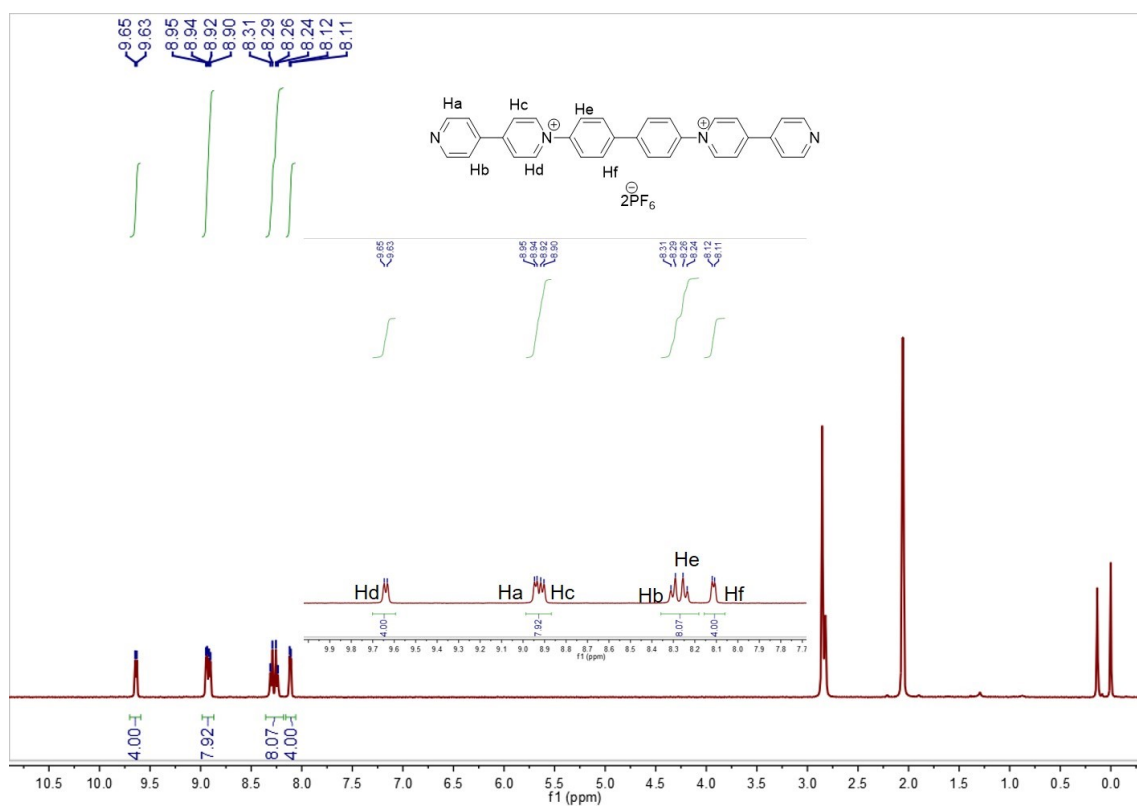

**Fig. S3**  $^1\text{H}$  NMR spectrum (400 MHz,  $\text{acetone-}d_6$ , 293K) of **G.S2**

3. Host–guest complexation between **SeP5** and **G**

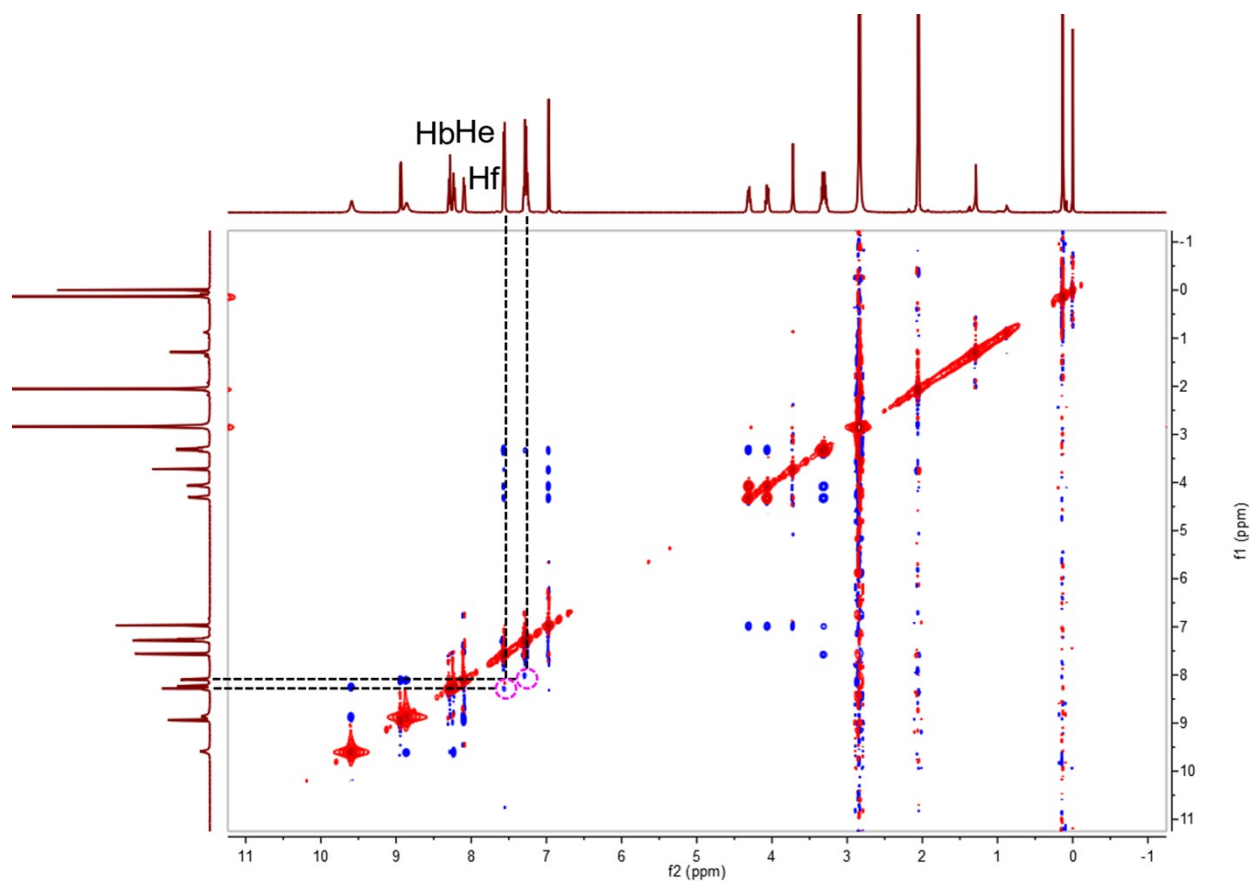

**Fig. S4** 2D NOESY spectrum (500 MHz, acetone-*d*<sub>6</sub>, 293 K) of **SeP5** (10.0 mM) and **G** (10.0 mM).

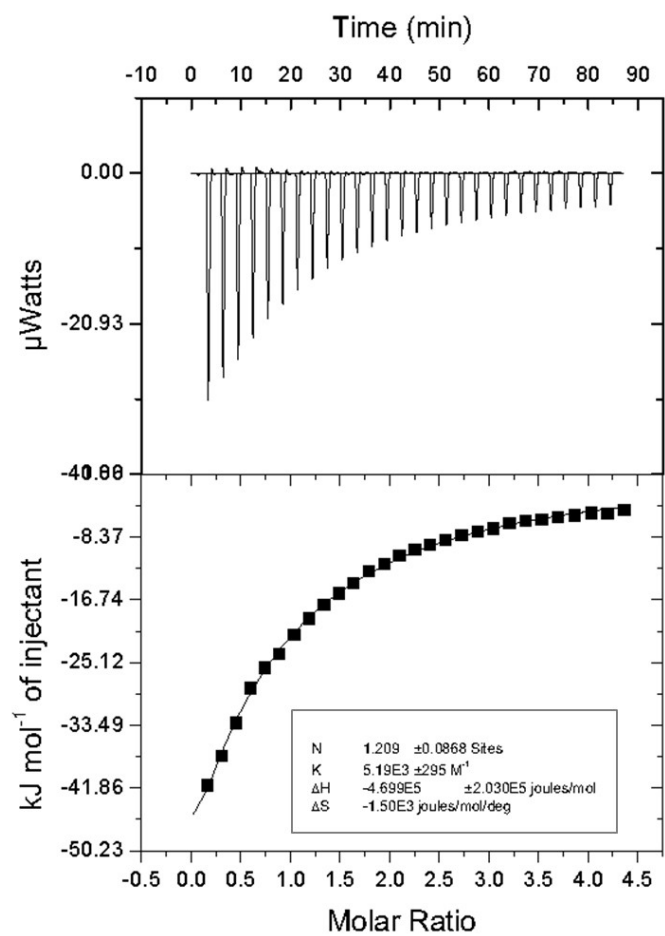

**Fig. S5** Microcalorimetric titration of **G** with **SeP5** in acetone at 298 K. (Top) Raw ITC data for 29 sequential injections (10.0  $\mu\text{L}$  per injection) of a **G** solution (2.00 mM) into a **SeP5** solution (0.100 mM). (Bottom) Net reaction heat obtained from the integration of the calorimetric traces.

#### 4. $H_2O_2$ -responsiveness of *SeP5* and *G* complex

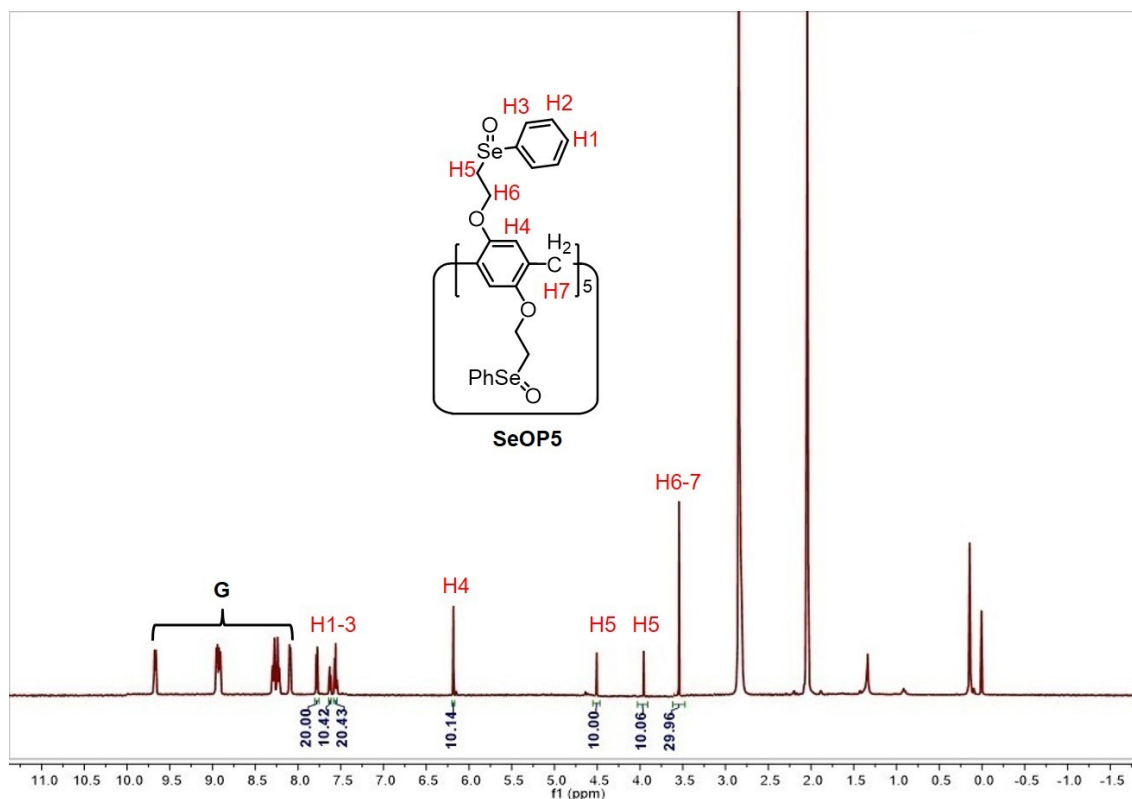

**Fig. S6**  $^1H$  NMR spectrum (400 MHz, acetone- $d_6$ , 293K) of *SeP5* and *G* complex after adding 30%  $H_2O_2$ .

#### 5. $H_2O_2$ -responsiveness of poly-pseudorotaxane *SeP5-G-Ag*

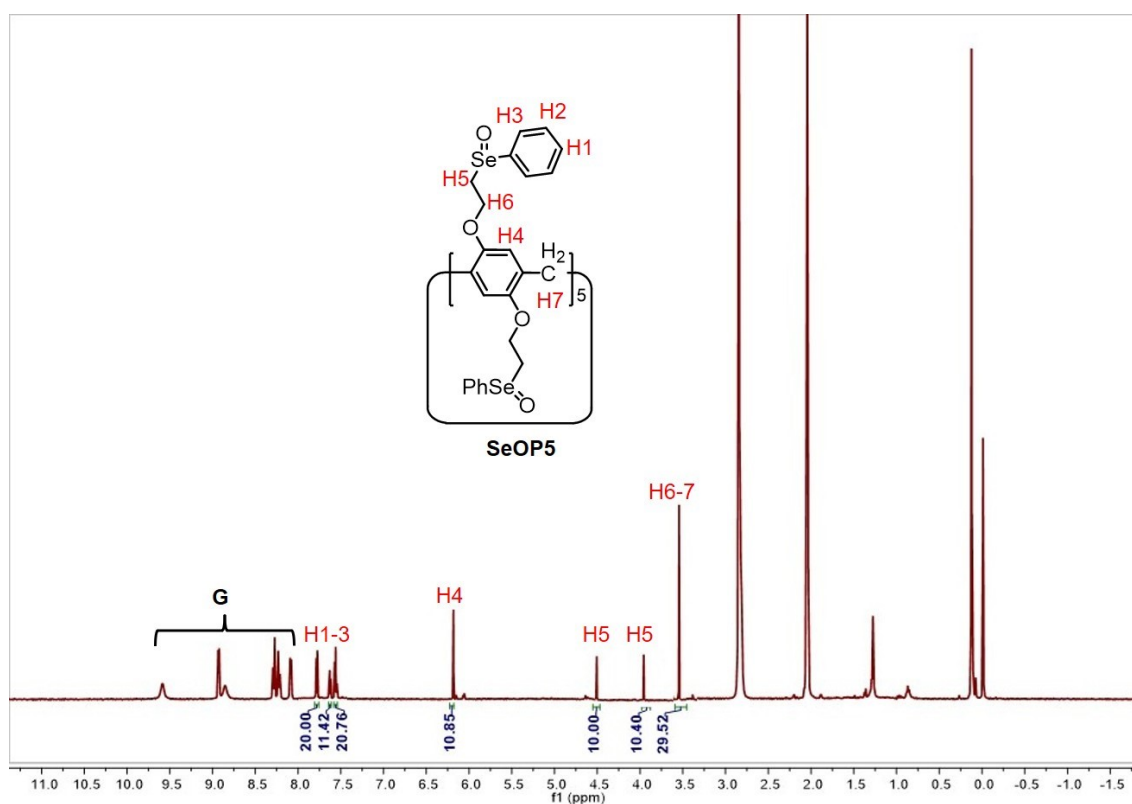

**Fig. S7**  $^1H$  NMR spectrum (400 MHz, acetone- $d_6$ , 293K) of *SeP5-G-Ag* after adding 30%  $H_2O_2$ .

6. DOSY NMR spectra of **SeP5-G-Ag** at different concentrations

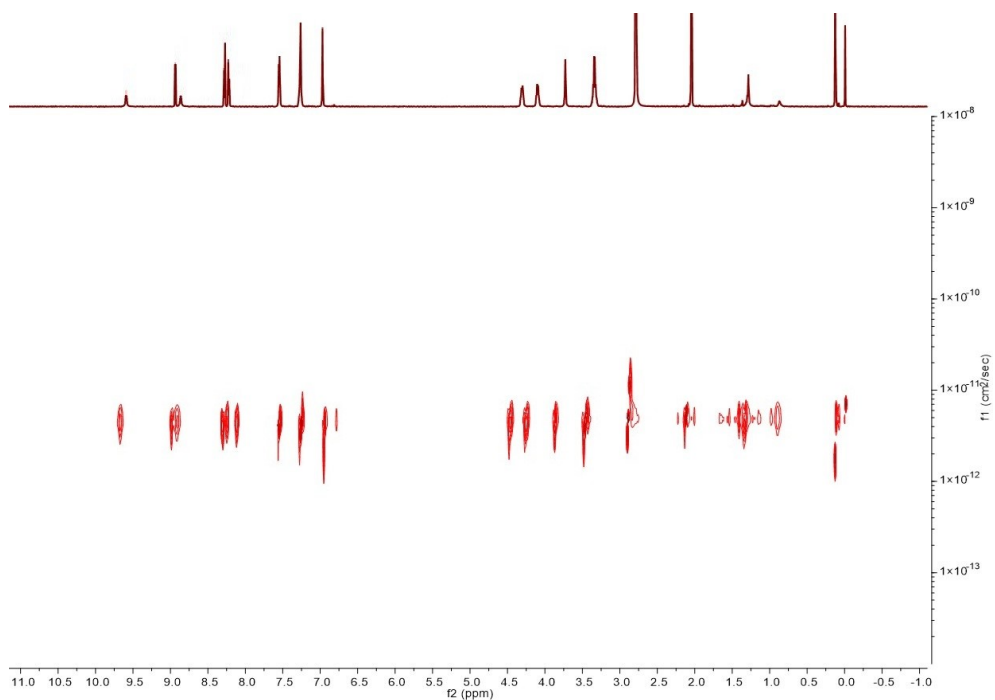

(a)

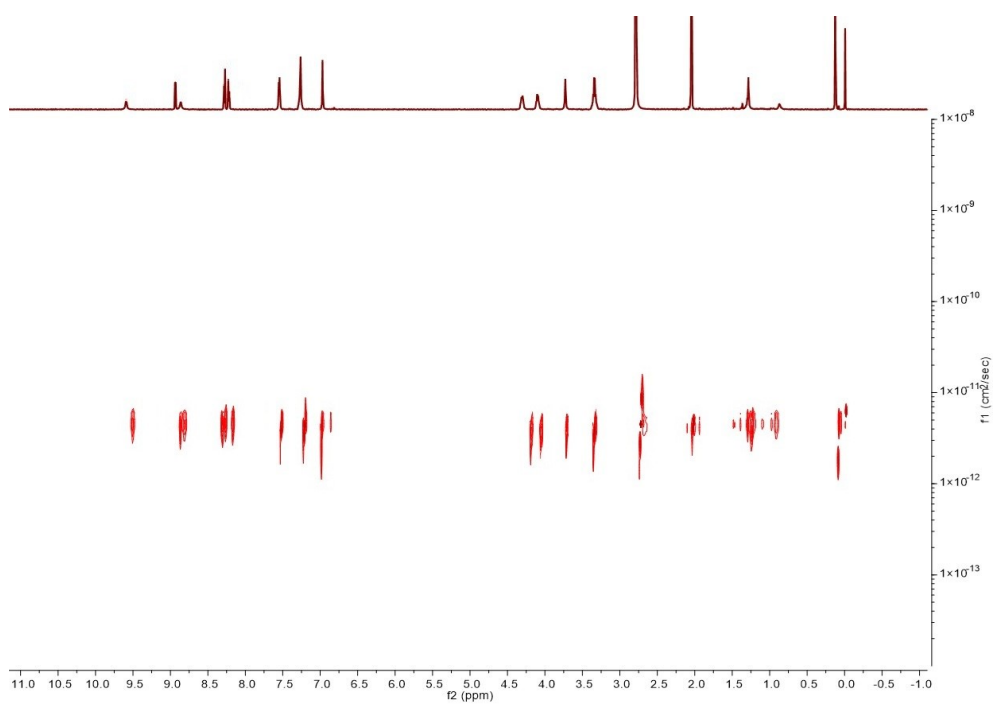

(b)

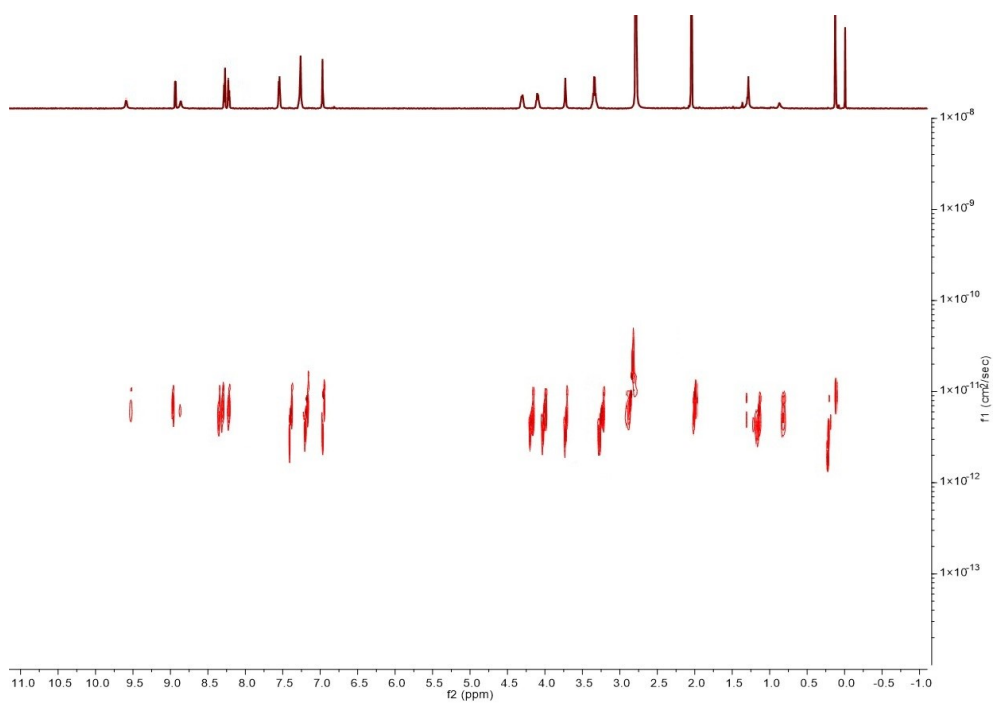

(c)

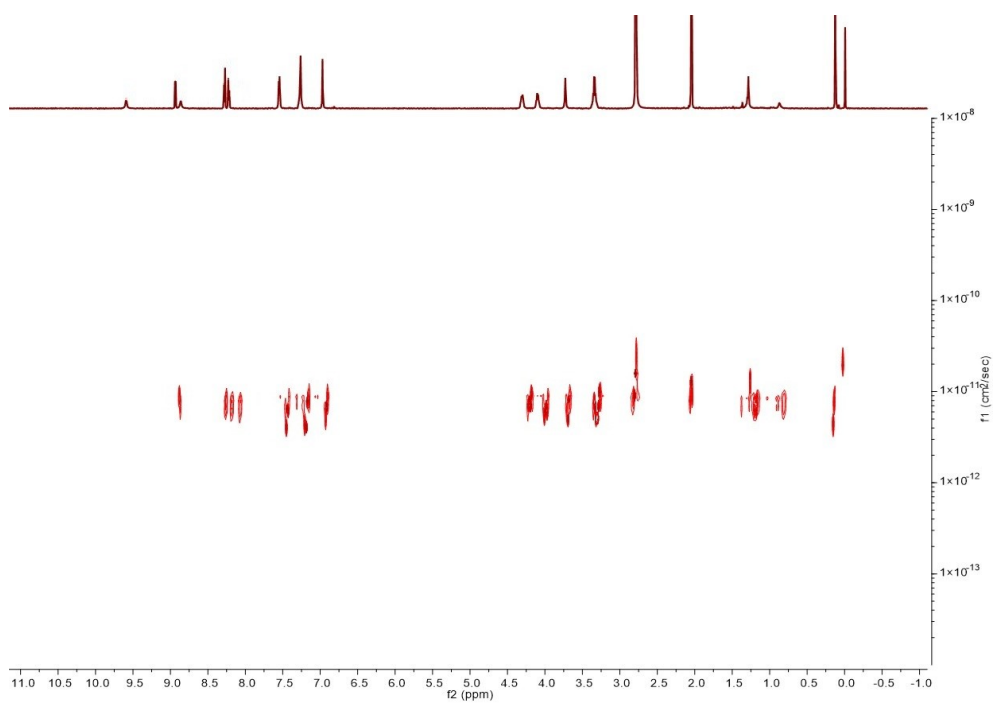

(d)

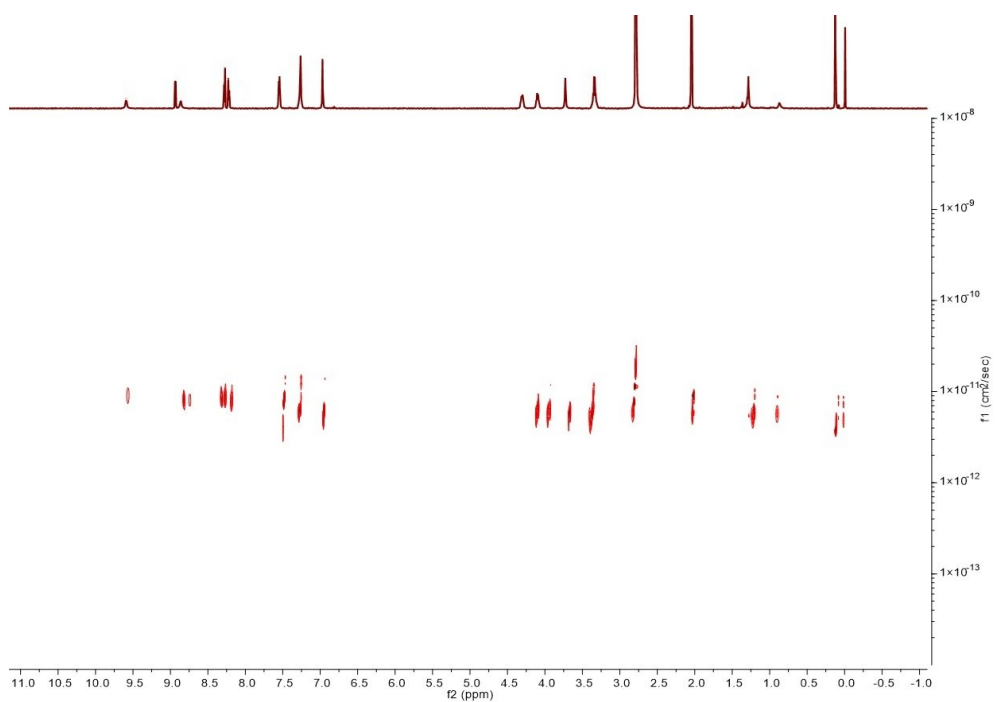

(e)

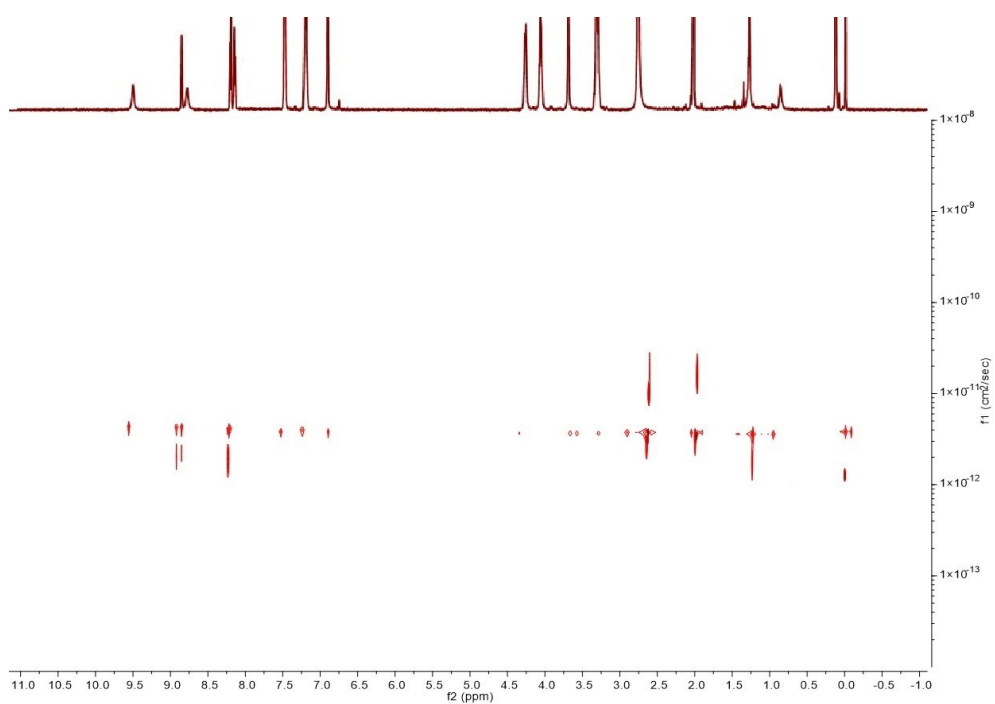

(f)

**Fig. S8** DOSY NMR spectra of **SeP5-G-Ag** (500 MHz, acetone- $d_6$ , 298 K) at different concentrations: (a) 100.0 mM; (b) 75.0 mM; (c) 50.0 mM; (d) 25.0 mM; (e) 12.50 mM; (f) 6.0 mM.

7. The host-guest control experiment

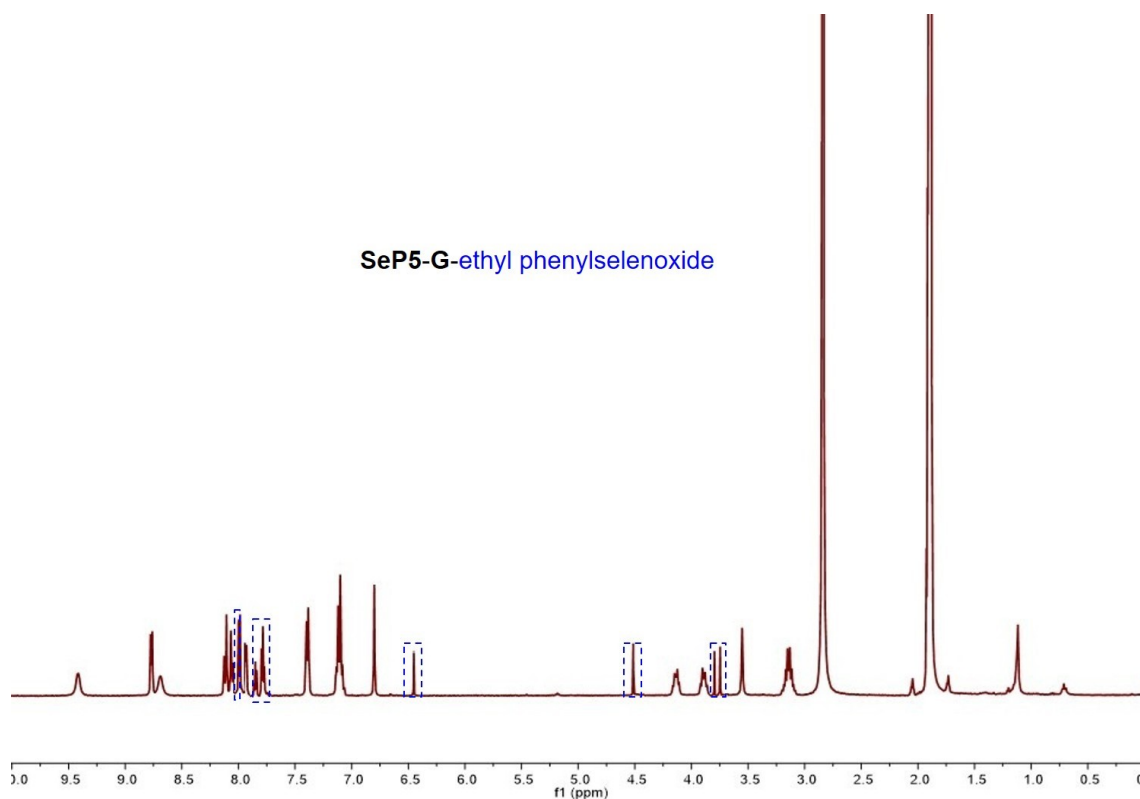

**Fig. S9** <sup>1</sup>H NMR spectrum (400 MHz, acetone-*d*<sub>6</sub>, 293K) of SeP5-G after adding 10 equiv. ethyl phenylselenoxide.

8. H<sub>2</sub>O<sub>2</sub>-responsiveness of G-Ag

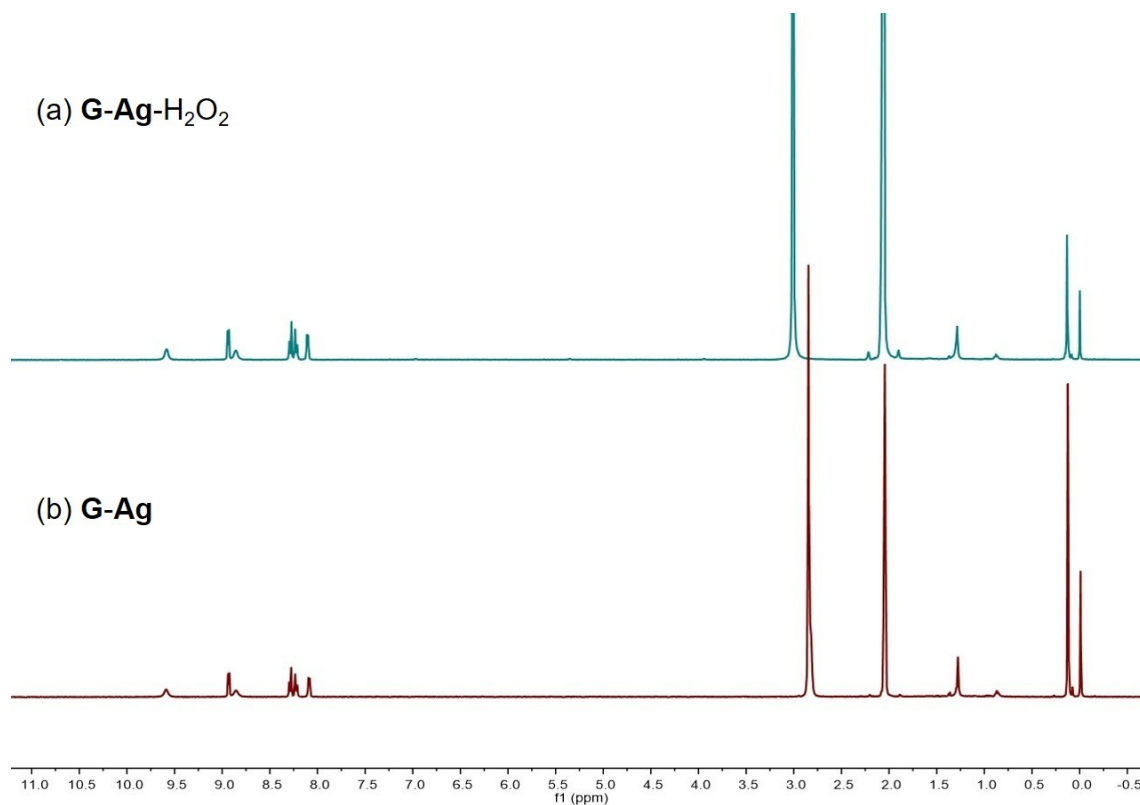

**Fig. S10** <sup>1</sup>H NMR spectrum (400 MHz, acetone-*d*<sub>6</sub>, 293K) of G-Ag (bottom) after adding 30% H<sub>2</sub>O<sub>2</sub> (top).

## References

- S1. Y. Zhou, K. Jie and F. Huang, *Chem. Commun.*, 2017, **53**, 8364.
- S2. S. K. Samanta, K. G. Bray and L. Isaacs, *Chem. Commun.*, 2017, **53**, 2756.
